# Supplementary material for: Heat-Induced Proteotoxic Stress Response in Placenta-Derived Stem Cells (PDSCs) Is Mediated through HSPA1A and HSPA1B with a Potential Higher Role for HSPA1B
Source: MDPI journal article supplement (doi:10.3390/cimb44100324), 2022-10-10
Supplement: s1 [file s1]

**Table S1:** Gene List for Human Heat Shock Proteins & Chaperones RT<sup>2</sup> Profiler PCR Array (Qiagen) allows for simultaneous expression analysis of 84 genes from the HSP90 Family (81 to 99 kDa), HSP70 Family (65 to 80 kDa), HSP60 Family (55 to 64 kDa), HSP40 Family (35 to 54 kDa), small HSPs (<34 kDa), and Chaperone cofactors.

| Position | UniGene   | GenBank      | Symbol  | Description                                     |
|----------|-----------|--------------|---------|-------------------------------------------------|
| A01      | Hs.118241 | NM_020247    | ADCK3   | AarF domain containing kinase 3                 |
| A02      | Hs.492740 | NM_007348    | ATF6    | Activating transcription factor 6               |
| A03      | Hs.377484 | NM_004323    | BAG1    | BCL2-associated athanogene                      |
| A04      | Hs.729098 | NM_004282    | BAG2    | BCL2-associated athanogene 2                    |
| A05      | Hs.523309 | NM_004281    | BAG3    | BCL2-associated athanogene 3                    |
| A06      | Hs.194726 | NM_004874    | BAG4    | BCL2-associated athanogene 4                    |
| A07      | Hs.5443   | NM_004873    | BAG5    | BCL2-associated athanogene 5                    |
| A08      | Hs.502917 | NM_005125    | CCS     | Copper chaperone for superoxide dismutase       |
| A09      | Hs.189772 | NM_006431    | CCT2    | Chaperonin containing TCPI, subunit 2 (beta)    |
| A10      | Hs.491494 | NM_005998    | CCT3    | Chaperonin containing TCPI, subunit 3 (gamma)   |
| A11      | Hs.421509 | NM_006430    | CCT4    | Chaperonin containing TCPI, subunit 4 (delta)   |
| A12      | Hs.1600   | NM_012073    | CCT5    | Chaperonin containing TCPI, subunit 5 (epsilon) |
| B01      | Hs.82916  | NM_001762    | CCT6A   | Chaperonin containing TCPI, subunit 6A (zeta 1) |
| B02      | Hs.73072  | NM_006584    | CCT6B   | Chaperonin containing TCPI, subunit 6B (zeta 2) |
| B03      | Hs.368149 | NM_006429    | CCT7    | Chaperonin containing TCPI, subunit 7 (eta)     |
| B04      | Hs.184085 | NM_000394    | CRYAA   | Crystallin, alpha A                             |
| B05      | Hs.408767 | NM_001885    | CRYAB   | Crystallin, alpha B                             |
| B06      | Hs.445203 | NM_001539    | DNAJA1  | DnaJ (Hsp40) homolog, subfamily A, member 1     |
| B07      | Hs.368078 | NM_005880    | DNAJA2  | DnaJ (Hsp40) homolog, subfamily A, member 2     |
| B08      | Hs.459779 | NM_005147    | DNAJA3  | DnaJ (Hsp40) homolog, subfamily A, member 3     |
| B09      | Hs.513053 | NM_018602    | DNAJA4  | DnaJ (Hsp40) homolog, subfamily A, member 4     |
| B10      | Hs.515210 | NM_006145    | DNAJB1  | DnaJ (Hsp40) homolog, subfamily B, member 1     |
| B11      | Hs.317192 | NM_016306    | DNAJB11 | DnaJ (Hsp40) homolog, subfamily B, member 11    |
| B12      | Hs.696014 | NM_017626    | DNAJB12 | DnaJ (Hsp40) homolog, subfamily B, member 12    |
| C01      | Hs.567888 | NM_153614    | DNAJB13 | DnaJ (Hsp40) homolog, subfamily B, member 13    |
| C02      | Hs.577426 | NM_001031723 | DNAJB14 | DnaJ (Hsp40) homolog, subfamily B, member 14    |
| C03      | Hs.77768  | NM_006736    | DNAJB2  | DnaJ (Hsp40) homolog, subfamily B, member 2     |
| C04      | Hs.237506 | NM_012266    | DNAJB5  | DnaJ (Hsp40) homolog, subfamily B, member 5     |
| C05      | Hs.490745 | NM_005494    | DNAJB6  | DnaJ (Hsp40) homolog, subfamily B, member 6     |
| C06      | Hs.585042 | NM_145174    | DNAJB7  | DnaJ (Hsp40) homolog, subfamily B, member 7     |
| C07      | Hs.518241 | NM_153330    | DNAJB8  | DnaJ (Hsp40) homolog, subfamily B, member 8     |
| C08      | Hs.6790   | NM_012328    | DNAJB9  | DnaJ (Hsp40) homolog, subfamily B, member 9     |
| C09      | Hs.499000 | NM_022365    | DNAJC1  | DnaJ (Hsp40) homolog, subfamily C, member 1     |
| C10      | Hs.516632 | NM_018981    | DNAJC10 | DnaJ (Hsp40) homolog, subfamily C, member 10    |
| C11      | Hs.462640 | NM_018198    | DNAJC11 | DnaJ (Hsp40) homolog, subfamily C, member 11    |
| C12      | Hs.260720 | NM_201262    | DNAJC12 | DnaJ (Hsp40) homolog, subfamily C, member 12    |
| D01      | Hs.12707  | NM_015268    | DNAJC13 | DnaJ (Hsp40) homolog, subfamily C, member 13    |
| D02      | Hs.709320 | NM_032364    | DNAJC14 | DnaJ (Hsp40) homolog, subfamily C, member 14    |
| D03      | Hs.438830 | NM_013238    | DNAJC15 | DnaJ (Hsp40) homolog, subfamily C, member 15    |
| D04      | Hs.655410 | NM_015291    | DNAJC16 | DnaJ (Hsp40) homolog, subfamily C, member 16    |
| D05      | Hs.511069 | NM_018163    | DNAJC17 | DnaJ (Hsp40) homolog, subfamily C, member 17    |
| D06      | Hs.483537 | NM_152686    | DNAJC18 | DnaJ (Hsp40) homolog, subfamily C, member 18    |
| D07      | Hs.131887 | NM_194283    | DNAJC21 | DnaJ (Hsp40) homolog, subfamily C, member 21    |
| D08      | Hs.59214  | NM_006260    | DNAJC3  | DnaJ (Hsp40) homolog, subfamily C, member 3     |
| D09      | Hs.172847 | NM_005528    | DNAJC4  | DnaJ (Hsp40) homolog, subfamily C, member 4     |

| Position | UniGene   | GenBank          | Symbol       | Description                                                                                         |
|----------|-----------|------------------|--------------|-----------------------------------------------------------------------------------------------------|
| D10      | Hs.164419 | NM_025219        | DNAJC5       | DnaJ (Hsp40) homolog, subfamily C, member 5                                                         |
| D11      | Hs.491885 | NM_033105        | DNAJC5B      | DnaJ (Hsp40) homolog, subfamily C, member 5 beta                                                    |
| D12      | Hs.116303 | NM_173650        | DNAJC5<br>C  | DnaJ (Hsp40) homolog, subfamily C, member 5 gamma                                                   |
| E01      | Hs.647643 | NM_014787        | DNAJC6       | DnaJ (Hsp40) homolog, subfamily C, member 6                                                         |
| E02      | Hs.500156 | NM_003315        | DNAJC7       | DnaJ (Hsp40) homolog, subfamily C, member 7                                                         |
| E03      | Hs.433540 | NM_014280        | DNAJC8       | DnaJ (Hsp40) homolog, subfamily C, member 8                                                         |
| E04      | Hs.654694 | NM_015190        | DNAJC9       | DnaJ (Hsp40) homolog, subfamily C, member 9                                                         |
| E05      | Hs.530227 | NM_005526        | HSF1         | Heat shock transcription factor 1                                                                   |
| E06      | Hs.158195 | NM_004506        | HSF2         | Heat shock transcription factor 2                                                                   |
| E07      | Hs.512156 | NM_001538        | HSF4         | Heat shock transcription factor 4                                                                   |
| E08      | Hs.525600 | NM_00101796<br>3 | HSP90AA<br>1 | Heat shock protein 90kDa alpha (cytosolic), class A member 1                                        |
| E09      | Hs.509736 | NM_007355        | HSP90AB<br>1 | Heat shock protein 90kDa alpha (cytosolic), class B member 1                                        |
| E10      | Hs.192374 | NM_003299        | HSP90B1      | Heat shock protein 90kDa beta (Grp94), member 1                                                     |
| E11      | Hs.534169 | NM_016299        | HSPA14       | Heat shock 70kDa protein 14                                                                         |
| E12      | Hs.728810 | NM_005345        | HSPA1A       | Heat shock 70kDa protein 1A                                                                         |
| F01      | Hs.274402 | NM_005346        | HSPA1B       | Heat shock 70kDa protein 1B                                                                         |
| F02      | Hs.690634 | NM_005527        | HSPA1L       | Heat shock 70kDa protein 1-like                                                                     |
| F03      | Hs.728938 | NM_021979        | HSPA2        | Heat shock 70kDa protein 2                                                                          |
| F04      | Hs.90093  | NM_002154        | HSPA4        | Heat shock 70kDa protein 4                                                                          |
| F05      | Hs.135554 | NM_014278        | HSPA4L       | Heat shock 70kDa protein 4-like                                                                     |
| F06      | Hs.716396 | NM_005347        | HSPA5        | Heat shock 70kDa protein 5 (glucose-regulated protein, 78kDa)                                       |
| F07      | Hs.654614 | NM_002155        | HSPA6        | Heat shock 70kDa protein 6 (HSP70B')                                                                |
| F08      | Hs.702021 | NM_006597        | HSPA8        | Heat shock 70kDa protein 8                                                                          |
| F09      | Hs.184233 | NM_004134        | HSPA9        | Heat shock 70kDa protein 9 (mortalin)                                                               |
| F10      | Hs.520973 | NM_001540        | HSPB1        | Heat shock 27kDa protein 1                                                                          |
| F11      | Hs.709660 | NM_001541        | HSPB2        | Heat shock 27kDa protein 2                                                                          |
| F12      | Hs.41707  | NM_006308        | HSPB3        | Heat shock 27kDa protein 3                                                                          |
| G01      | Hs.534538 | NM_144617        | HSPB6        | Heat shock protein, alpha-crystallin-related, B6                                                    |
| G02      | Hs.502612 | NM_014424        | HSPB7        | Heat shock 27kDa protein family, member 7 (cardiovascular)                                          |
| G03      | Hs.400095 | NM_014365        | HSPB8        | Heat shock 22kDa protein 8                                                                          |
| G04      | Hs.595053 | NM_002156        | HSPD1        | Heat shock 60kDa protein 1 (chaperonin)                                                             |
| G05      | Hs.1197   | NM_002157        | HSPE1        | Heat shock 10kDa protein 1 (chaperonin 10)                                                          |
| G06      | Hs.36927  | NM_006644        | HSPH1        | Heat shock 105kDa/110kDa protein 1                                                                  |
| G07      | Hs.483564 | NM_002622        | PFDN1        | Prefoldin subunit 1                                                                                 |
| G08      | Hs.492516 | NM_012394        | PFDN2        | Prefoldin subunit 2                                                                                 |
| G09      | Hs.596449 | NM_001235        | SERPINH<br>1 | Serpin peptidase inhibitor, clade H (heat shock protein 47), member 1, (collagen binding protein 1) |
| G10      | Hs.483521 | NM_022464        | SIL1         | SIL1 homolog, endoplasmic reticulum chaperone (S. cerevisiae)                                       |
| G11      | Hs.363137 | NM_030752        | TCPI         | T-complex 1                                                                                         |
| G12      | Hs.534312 | NM_000113        | TOR1A        | Torsin family 1, member A (torsin A)                                                                |
| H01      | Hs.520640 | NM_001101        | ACTB         | Actin, beta                                                                                         |
| H02      | Hs.534255 | NM_004048        | B2M          | Beta-2-microglobulin                                                                                |
| H03      | Hs.592355 | NM_002046        | GAPDH        | Glyceraldehyde-3-phosphate dehydrogenase                                                            |
| H04      | Hs.412707 | NM_000194        | HPR11        | Hypoxanthine phosphoribosyltransferase 1                                                            |
| H05      | Hs.546285 | NM_001002        | RPLP0        | Ribosomal protein, large, P0                                                                        |
| H06      | N/A       | SA_00105         | HGDC         | Human Genomic DNA Contamination                                                                     |
| H07      | N/A       | SA_00104         | RTC          | Reverse Transcription Control                                                                       |
| H08      | N/A       | SA_00104         | RTC          | Reverse Transcription Control                                                                       |
| H09      | N/A       | SA_00104         | RTC          | Reverse Transcription Control                                                                       |
| H10      | N/A       | SA_00103         | PPC          | Positive PCR Control                                                                                |
| H11      | N/A       | SA_00103         | PPC          | Positive PCR Control                                                                                |
| H12      | N/A       | SA_00103         | PPC          | Positive PCR Control                                                                                |

**Table S2:** RT<sup>2</sup> Profiler PCR Array results. Tabulated values fit the criteria of Log<sub>2</sub> fold-change>1.5 and p<0.05 at 0H or in at least one of the analyzed recovery time-point conditions.

| FAMILY                                                          | GENE     | DBMSC             |       |       |       |       | DPMSC             |       |       |       |       | pMSC              |       |       |       |
|-----------------------------------------------------------------|----------|-------------------|-------|-------|-------|-------|-------------------|-------|-------|-------|-------|-------------------|-------|-------|-------|
|                                                                 |          | 0H                | 1H    | 3H    | 6H    | 24H   | 0H                | 1H    | 3H    | 6H    | 24H   | 0H                | 1H    | 3H    | 6H    |
| Heat shock<br>70 kDa<br>protein                                 | HSPA1B   | 6.69*             | 7.96* | 6.69* | 4.93* | 0.60  | 7.66*             | 8.87* | 8.84* | 6.65* | 1.94* | 7.19*             | 8.36* | 7.92* | 6.08* |
|                                                                 | HSPA1A   | 5.1*              | 7.53* | 6.37* | 4.49* | 0.85  | 6.15*             | 6.95* | 6.72* | 5.93* | 1.58* | 5.96*             | 6.49* | 6.67* | 6.24* |
|                                                                 | HSPA1L   | 1.26              | 1.81* | 1.86* | 1.25  | -0.22 | No Overexpression |       |       |       |       | No Overexpression |       |       |       |
|                                                                 | HSPA4L   | 0.61              | 4.28* | 4.18* | 3.07* | 1.83  | 1.92              | 3.74* | 3.54* | 3.63* | 3.15* | 0.85              | 2.52* | 3.36* | 3.47* |
|                                                                 | HSPA5    | No Overexpression |       |       |       |       | 0.93              | 3.23* | 4.31* | 3.37* | 0.46  | No Overexpression |       |       |       |
|                                                                 | HSPA6    | No Overexpression |       |       |       |       | C>30              |       |       |       |       | C>30              |       |       |       |
| Small Heat<br>Shock<br>Protein                                  | HSPB1    | -0.10             | 1.86* | 0.59  | -0.47 | -0.63 | 0.97              | 1.27  | 1.76* | 1.56* | 0.94  | No Overexpression |       |       |       |
|                                                                 | HSPB8    | 0.62              | 1.86* | 1.24  | -0.02 | -0.13 | 1.02              | 1.94  | 2.3*  | 1.18  | 0.54  | No Overexpression |       |       |       |
|                                                                 | CRYAB    | 1.28              | 3*    | 2.92* | 1.73* | 2.49* | 1.96              | 2.53* | 2.62* | 2.52* | 2.47* | 1.13              | 2.53  | 3.67* | 3.54* |
| DnaJ<br>homolog<br>subfamily A                                  | DNAJA1   | -0.41             | 2.11* | 0.72  | -0.29 | -0.49 | 1.28              | 1.76  | 2.18* | 1.53* | 0.23  | No Overexpression |       |       |       |
|                                                                 | DNAJA4   | 3.23*             | 6.01* | 6.19* | 5.10* | 1.79  | 3.08*             | 5.19* | 4.98* | 4.87* | 0.82  | 3.70*             | 5.16* | 5.94* | 5.94* |
| DnaJ<br>homolog<br>subfamily B                                  | DNAJB1   | 2.92*             | 4.78* | 3.01* | 1.93* | -0.51 | 4.95*             | 5.46* | 5.22* | 3.48* | 0.23  | 3.69*             | 4.44* | 4.45* | 2.72  |
|                                                                 | DNAJB9   | -1.35             | 2.03* | 1.89* | 1.5   | -0.98 | No Overexpression |       |       |       |       | No Overexpression |       |       |       |
| 60 kDa heat<br>shock<br>protein,<br>mitochondria<br>l           | HSPD1    | 0.06              | 2.01* | 1.45  | 0.17  | 0.19  | No Overexpression |       |       |       |       | No Overexpression |       |       |       |
| Heat shock<br>protein<br>90kDa alpha<br>(cytosolic),<br>class A | HSP90AA1 | -0.12             | 1.92* | 0.95  | -0.43 | 0.29  | No Overexpression |       |       |       |       | No Overexpression |       |       |       |
| Heat shock<br>protein 105<br>kDa                                | HSPH1    | 1.52              | 4.62* | 3.91* | 2.95* | 0.81  | 1.84              | 2.85* | 2.77* | 2.91* | 0.26  | 2.52              | 3.31  | 3.62* | 3.62* |
| BAG family<br>molecular<br>chaperone<br>regulator 3             | BAG3     | 0.98              | 3.05* | 3.50* | 1.93* | 0.70  | 2.54*             | 2.78* | 3.34* | 3.07* | 1.04  | 1.01              | 2.35  | 3.56* | 2.56* |

**Table S3:** The gene- and protein expression fold change values in comparison to Control Cells.

| HSPA1B |                 |       |      |         |                    |       |      |         |
|--------|-----------------|-------|------|---------|--------------------|-------|------|---------|
|        | GENE EXPRESSION |       |      |         | PROTEIN EXPRESSION |       |      |         |
|        | DBMSC           | DPMSC | pMSC | Average | DBMSC              | DPMSC | pMSC | Average |
| 0H     | 6.79            | 7.86  | 7.19 | 7.28    | 1.76               | 2.21  | 1.86 | 1.94    |
| 1H     | 7.96            | 8.91  | 8.36 | 8.41    | 4.05               | 3.52  | 2.99 | 3.52    |
| 6H     | 4.93            | 6.65  | 6.08 | 5.89    | 4.22               | 4.06  | 4.38 | 4.22    |
| 24H    | 0.60            | 1.94  | 1.00 | 1.18    | 3.08               | 3.31  | 4.08 | 3.49    |
| HSPA1A |                 |       |      |         |                    |       |      |         |
|        | GENE EXPRESSION |       |      |         | PROTEIN EXPRESSION |       |      |         |
|        | DBMSC           | DPMSC | pMSC | Average | DBMSC              | DPMSC | pMSC | Average |
| 0H     | 5.10            | 6.35  | 5.96 | 5.80    | 0.29               | 1.36  | 0.52 | 0.72    |
| 1H     | 6.53            | 6.84  | 6.49 | 6.62    | 1.26               | 1.74  | 0.87 | 1.29    |
| 6H     | 4.49            | 5.93  | 6.24 | 5.55    | 1.65               | 2.07  | 1.83 | 1.85    |
| 24H    | 0.85            | 1.58  | 1.00 | 1.14    | 1.47               | 1.77  | 1.63 | 1.62    |

**Table S4:** The gene- and protein expression fold change values in comparison to 0H.

| HSPA1B     |                 |       |      |         |                    |       |      |         |
|------------|-----------------|-------|------|---------|--------------------|-------|------|---------|
|            | GENE EXPRESSION |       |      |         | PROTEIN EXPRESSION |       |      |         |
|            | DBMSC           | DPMSC | pMSC | Average | DBMSC              | DPMSC | pMSC | Average |
| <b>1H</b>  | 2.25            | 2.32  | 2.24 | 2.3     | 4.91               | 2.5   | 2.2  | 3.20    |
| <b>3H</b>  | 0.93            | 2.27  | 1.65 | 1.61    |                    |       |      |         |
| <b>6H</b>  | 0.28            | 0.05  | 0.46 | 0.4     | 5.5                | 3.62  | 5.73 | 4.95    |
| <b>24H</b> | 0.02            | 0.02  | 0.03 | 0.02    | 2.5                | 2.15  | 4.65 | 3.10    |
| HSPA1A     |                 |       |      |         |                    |       |      |         |
|            | GENE EXPRESSION |       |      |         | PROTEIN EXPRESSION |       |      |         |
|            | DBMSC           | DPMSC | pMSC | Average | DBMSC              | DPMSC | pMSC | Average |
| <b>1H</b>  | 2.7             | 1.74  | 1.44 | 1.96    | 1.96               | 1.31  | 1.28 | 1.51    |
| <b>3H</b>  | 2.41            | 1.48  | 1.63 | 1.84    |                    |       |      |         |
| <b>6H</b>  | 0.86            | 0.86  | 1.50 | 1.01    | 2.55               | 1.64  | 2.49 | 2.23    |
| <b>24H</b> | 0.04            | 0.04  | 0.05 | 0.01    | 2.26               | 1.33  | 2.16 | 1.92    |

**Table S5:** HSPA1B/HSPA1A for gene- and protein expression fold change values

|            | HSPA1B/HSPA1A   |       |      |  |                    |       |      |
|------------|-----------------|-------|------|--|--------------------|-------|------|
|            | GENE EXPRESSION |       |      |  | PROTEIN EXPRESSION |       |      |
|            | DBMSC           | DPMSC | pMSC |  | DBMSC              | DPMSC | pMSC |
| <b>0H</b>  | 3.24            | 2.85  | 2.35 |  | 2.76               | 1.80  | 2.53 |
| <b>1H</b>  | 2.70            | 3.78  | 3.65 |  | 6.92               | 3.43  | 4.34 |
| <b>6H</b>  | 1.36            | 1.65  | 0.72 |  | 5.94               | 3.97  | 5.83 |
| <b>24H</b> | 1.19            | 1.28  | 1.28 |  | 3.05               | 2.91  | 5.47 |

**Table S6.** The human Hsp70 family of chaperones. Only the differentiating traits are highlighted.  
*Considerable input from [16]*

| Protein | UniProtID | Cellular Localization                                   | Stress Inducibility | Noticeable Function/Characteristic                                                                                                                                            |
|---------|-----------|---------------------------------------------------------|---------------------|-------------------------------------------------------------------------------------------------------------------------------------------------------------------------------|
| HspA1A  | P0DMV8    | Cytosol, nucleus, cell membrane, extracellular exosomes | Yes                 | 1. Regulation of centrosome integrity during mitosis<br>2. Negative regulation of HSF1 transcriptional activity during the heat shock response attenuation and recovery phase |
| HspA1B  | P0DMV9    | Cytosol, nucleus, extracellular exosomes                | Yes                 | Regulation of centrosome integrity during mitosis                                                                                                                             |
| HspA1L  | P34931    | Cytosol, nucleus                                        | No                  | Positive regulator of PRKN translocation to damaged mitochondria                                                                                                              |
| HspA2   | P54652    | Cytosol, nucleus, cell membrane, extracellular exosomes | No                  | Plays a role in spermatogenesis.                                                                                                                                              |
| HspA4   | P34932    | Cytosol, extracellular exosomes                         | No                  | 1. Chaperone-mediated protein complex assembly<br>2. Protein insertion into mitochondrial outer membrane                                                                      |
| HspA4L  | O95757    | Cytosol, nucleus                                        | Yes                 | 1. Responds to osmotic imbalance                                                                                                                                              |
| HspA5   | P11021    | ER, extracellular exosomes                              | No                  | 1. ER Chaperone                                                                                                                                                               |
| HspA6   | P17066    | Cytosol, extracellular exosomes                         | Yes                 | Expressed only at high temperature exposure                                                                                                                                   |
| HspA7   | P48741    | Blood microparticles, extracellular exosomes            | Yes                 | Putative heat shock 70 kDa protein                                                                                                                                            |
| HspA8   | P11142    | Cytosol, nucleus, cell membrane, extracellular exosomes | No                  | Critical role in mitochondrial transport                                                                                                                                      |
| HspA9   | P38646    | Mitochondria, nucleus                                   | No                  | Plays important role in mitochondrial iron-sulfur cluster (ISC) biogenesis.                                                                                                   |
| HspA12A | O43301    | Intracellular, extracellular exosomes                   | No                  | Contains an atypical heat shock protein 70 (Hsp70) ATPase domain, therefore considered to be a distant member of the mammalian Hsp70 family.                                  |
| HspA12B | B7ZLP2    | Endothelial cells, intracellular, blood plasma          | No                  |                                                                                                                                                                               |
| HspA13  | P48723    | ER, extracellular exosomes, microsomes                  | No                  | Ribosome-associated complex (RAC) component. Involved in folding or maintaining nascent polypeptides in a folding-competent state.                                            |
| HspA14  | Q0VDF9    | Cytosol membrane                                        | Yes                 |                                                                                                                                                                               |
