# Supplementary material for: Heat-Induced Proteotoxic Stress Response in Placenta-Derived Stem Cells (PDSCs) Is Mediated through HSPA1A and HSPA1B with a Potential Higher Role for HSPA1B
Source: MDPI journal article supplement (doi:10.3390/cimb44100324), 2022-10-10
Supplement: s1 [file s1]

**A**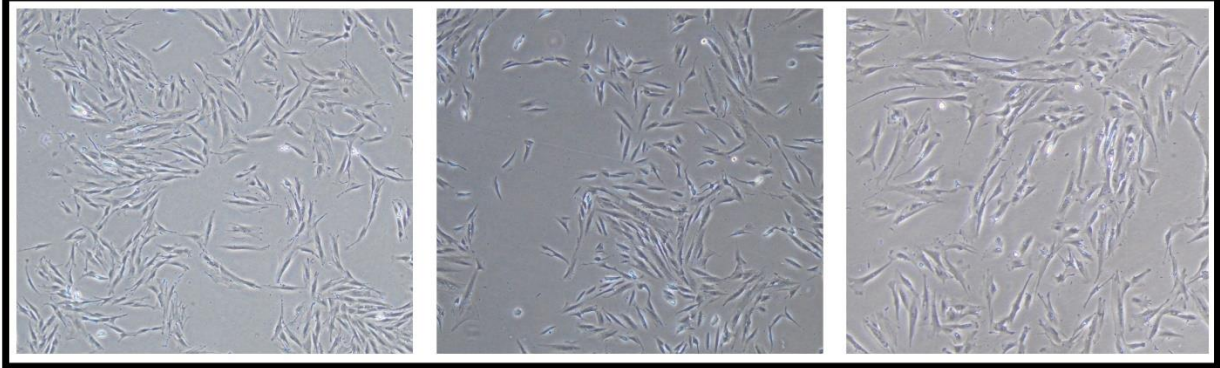**B**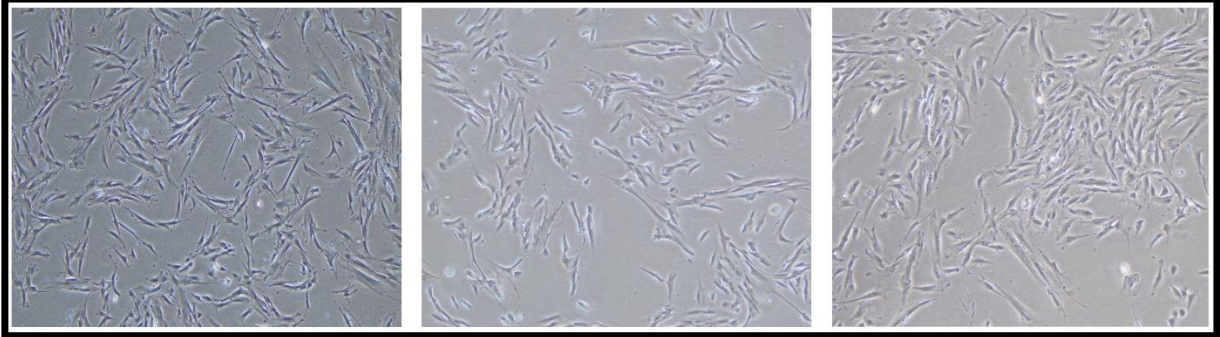**C**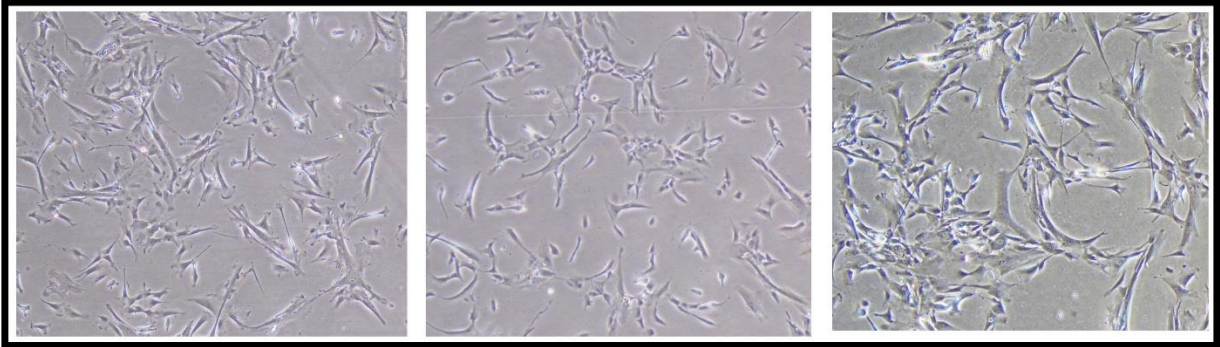

**Figure S1.** Cell culture and heat-stress experiments in Placenta-derived stem cells. (A) DBMSC (B) DPMSC , and (C) pMSC. Figures on the Left is Control cells, Middle is 0H i.e., immediately after heat-stress, and Right is cells recovered 24-hours post heat-stress exposure.

---

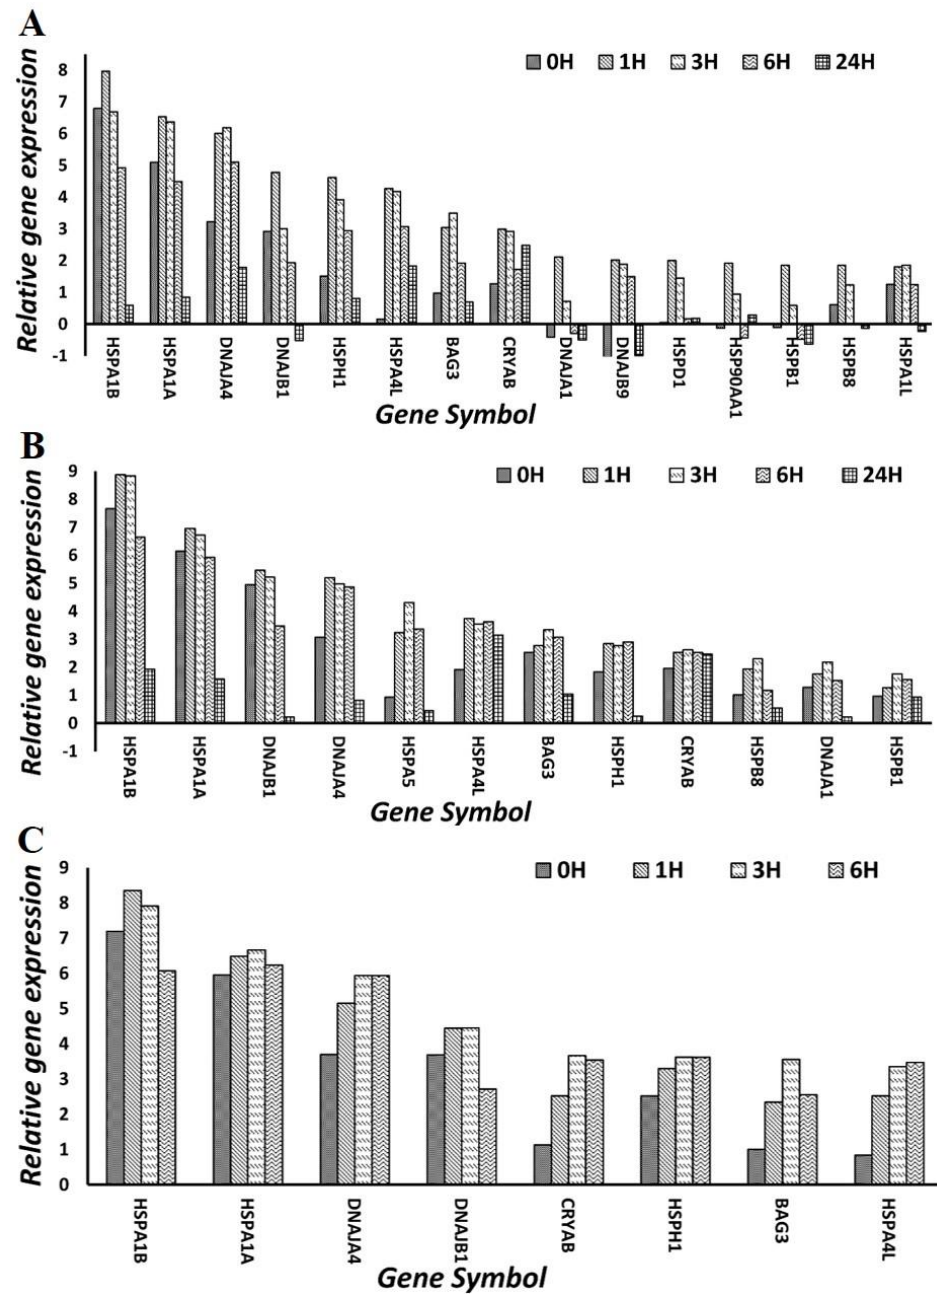

**Figure S2.** Human Heat Shock Proteins & Chaperones gene expression profile at conclusion of heat-stress (0H) and during recovery at 37°C at 1-hour (1H), 3 hours (3H), 6 hours (6H), and 24 hours (24H). (A) 15 genes in DBMSCs, (B) 12 genes in DPMSCs, and (C) 8 genes in pMSCs were detected to be overexpressed in a statistically significant ( $p < 0.05$ ) manner with Log<sub>2</sub> fold-change of 1.5, in at least at one of the analyzed time-points.

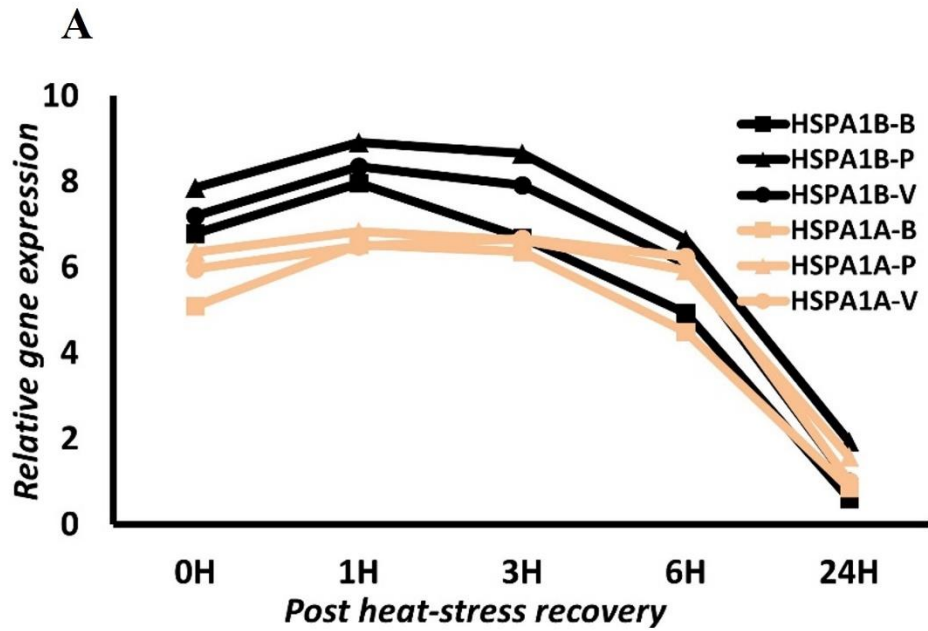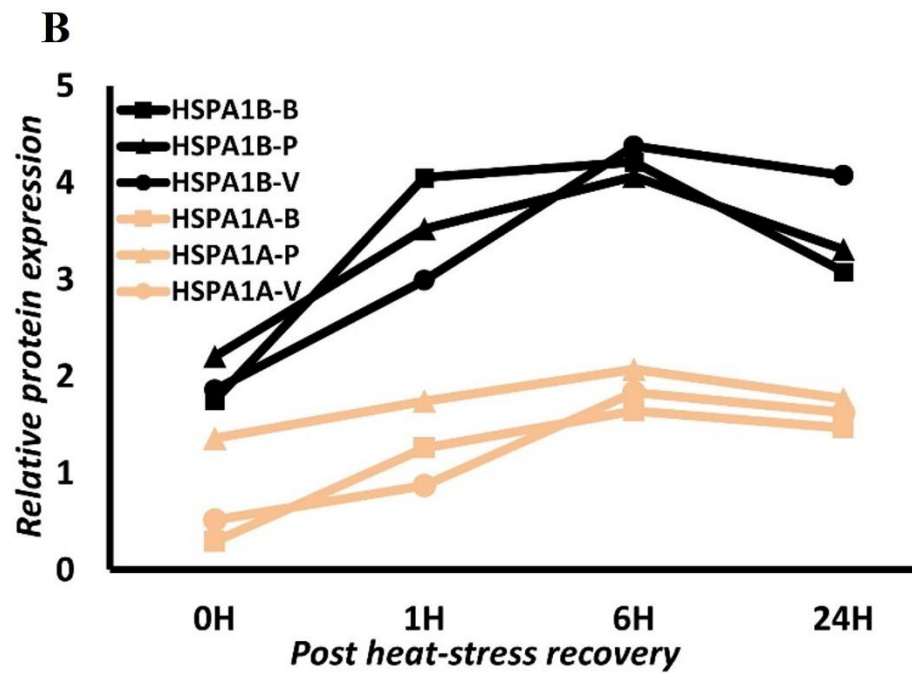

**Figure S3:** (A) Time-course of gene-expression. (B) Time-course of protein-expression. Log<sub>2</sub> fold-change values as function of time are plotted over 24 hours
